# Supplementary material for: Hotspots and trends of electrochemical biosensor technology: a bibliometric analysis from 2003 to 2023
Source: Royal Society of Chemistry journal article supplement (doi:10.1039/d3ra05889a), 2023-01-01
Supplement: d3ra05889a2.pdf [file d3ra05889a2.pdf]

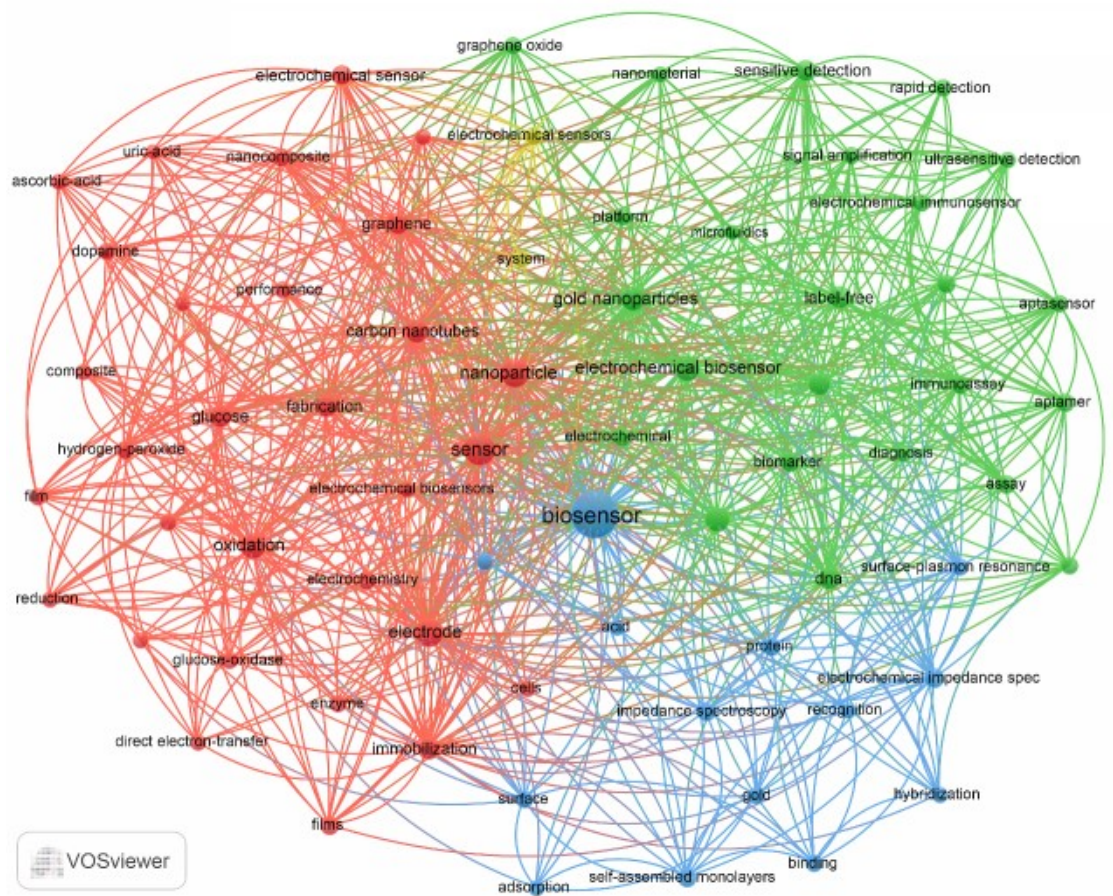

**Fig. S2.** Network visualization of co-occurrence analysis for keywords of 2002 American articles. Clustering of the top 70 keywords with the highest number of occurrences.

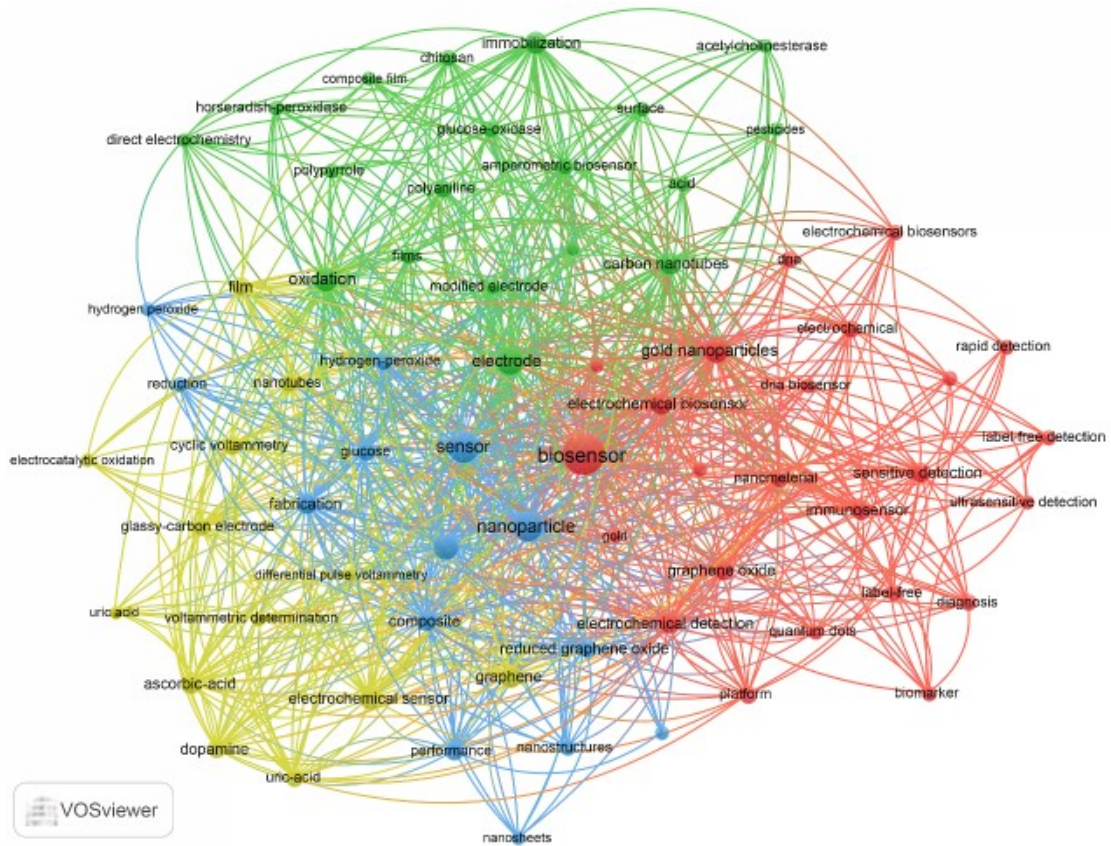

**Fig. S3.** Network visualization of co-occurrence analysis for keywords of 1918 Indian articles. Clustering of the top 70 keywords with the highest number of occurrences.

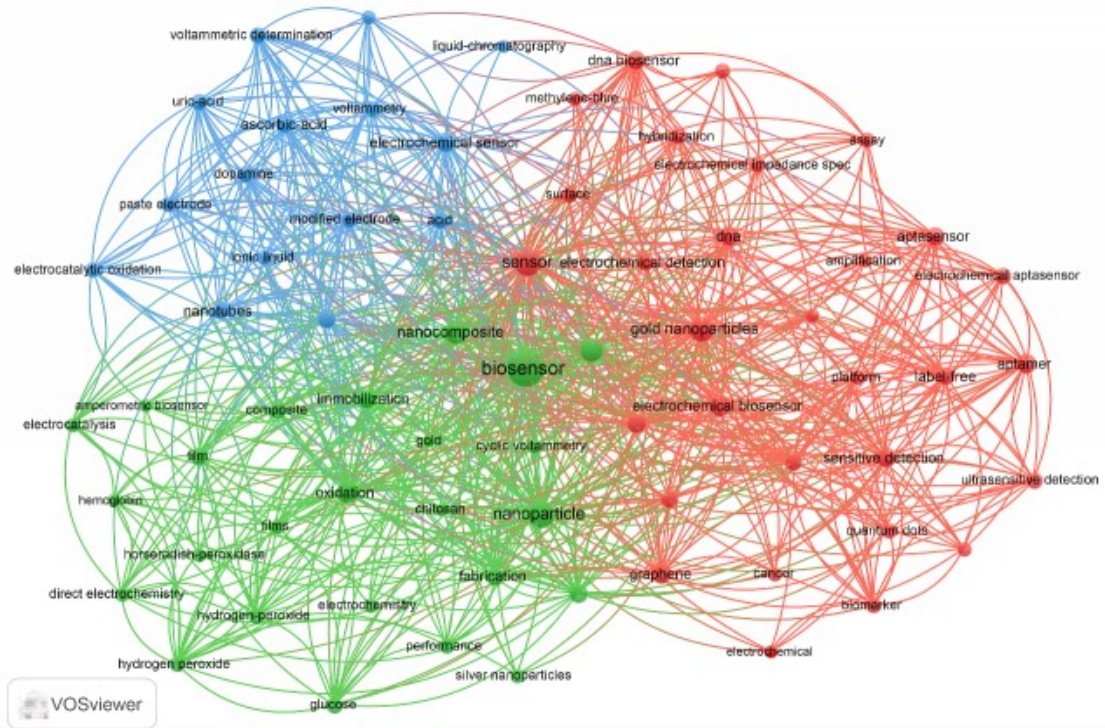

**Fig. S4.** Network visualization of co-occurrence analysis for keywords of 1486 Iranian articles. Clustering of the top 70 keywords with the highest number of occurrences.

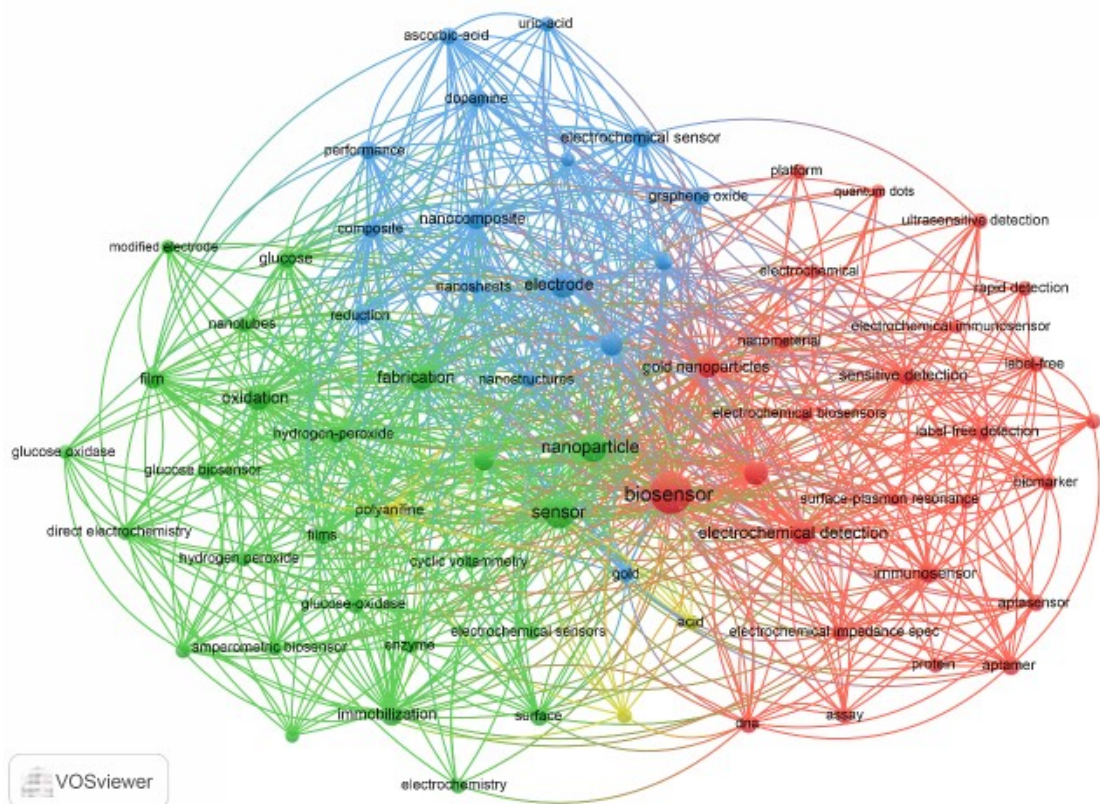

**Fig. S5.** Network visualization of co-occurrence analysis for keywords of 1144 Korean articles. Clustering of the top 70 keywords with the highest number of occurrences.
